# Supplementary material
Source: PubMed Central journal article supplement (PMC5571310)
Supplement: AAC.02761-16_zac009176478s1.pdf [file AAC.02761-16_zac009176478s1.pdf]

# Supplementary table 1

## IL-6

|                              | BALF       |         | Lung       |         | Plasma     |         |
|------------------------------|------------|---------|------------|---------|------------|---------|
|                              | Mean ± SEM | P-value | Mean ± SEM | P-value | Mean ± SEM | P-value |
| Levofloxacin alone           | 1895 ± 656 |         | 1311 ± 442 |         | 190 ± 58   |         |
| Levofloxacin + EM703 (-24 h) | 319 ± 91   | 0.0005  | 316 ± 81   | 0.0042  | 32 ± 10    | 0.0022  |
| Levofloxacin + EM703 (0 h)   | 495 ± 90   | 0.0238  | 383 ± 73   | 0.0206  | 31 ± 7     | 0.0096  |

## IL-10

|                              | BALF        |         | Lung        |         | Plasma      |         |
|------------------------------|-------------|---------|-------------|---------|-------------|---------|
|                              | Mean ± SEM  | P-value | Mean ± SEM  | P-value | Mean ± SEM  | P-value |
| Levofloxacin alone           | 9.01 ± 2.69 |         | 4.95 ± 0.84 |         | 5.92 ± 2.06 |         |
| Levofloxacin + EM703 (-24 h) | 5.14 ± 1.01 | 0.4588  | 9.99 ± 1.32 | 0.0506  | 4.00 ± 1.21 | >0.9999 |
| Levofloxacin + EM703 (0 h)   | 4.5 ± 1.59  | 0.2034  | 8.29 ± 2.43 | >0.9999 | 3.64 ± 0.78 | 0.7691  |

## MCP-1

|                              | BALF       |         | Lung       |         | Plasma     |         |
|------------------------------|------------|---------|------------|---------|------------|---------|
|                              | Mean ± SEM | P-value | Mean ± SEM | P-value | Mean ± SEM | P-value |
| Levofloxacin alone           | 3451 ± 494 |         | 1748 ± 198 |         | 92 ± 14    |         |
| Levofloxacin + EM703 (-24 h) | 1098 ± 150 | <0.0001 | 763 ± 188  | 0.0016  | 44 ± 10    | 0.0153  |
| Levofloxacin + EM703 (0 h)   | 1341 ± 216 | 0.0027  | 839 ± 132  | 0.0036  | 31 ± 6     | 0.0005  |

## INF-γ

|                              | BALF        |         | Lung        |         | Plasma      |         |
|------------------------------|-------------|---------|-------------|---------|-------------|---------|
|                              | Mean ± SEM  | P-value | Mean ± SEM  | P-value | Mean ± SEM  | P-value |
| Levofloxacin alone           | 1.71 ± 0.71 |         | 2.11 ± 0.89 |         | 0.84 ± 0.57 |         |
| Levofloxacin + EM703 (-24 h) | 0.81 ± 0.5  | 0.1099  | 0.64 ± 0.15 | 0.3563  | 0.29 ± 0.08 | >0.9999 |
| Levofloxacin + EM703 (0 h)   | 0.48 ± 0.09 | 0.3724  | 0.92 ± 0.29 | 0.9072  | 0.26 ± 0.07 | >0.9999 |

## TNF-α

|                              | BALF       |         | Lung       |         | Plasma      |         |
|------------------------------|------------|---------|------------|---------|-------------|---------|
|                              | Mean ± SEM | P-value | Mean ± SEM | P-value | Mean ± SEM  | P-value |
| Levofloxacin alone           | 439 ± 81   |         | 315 ± 57   |         | 7.06 ± 1.29 |         |
| Levofloxacin + EM703 (-24 h) | 168 ± 34   | 0.0082  | 107 ± 24   | 0.0008  | 3.89 ± 0.85 | 0.1309  |
| Levofloxacin + EM703 (0 h)   | 155 ± 22   | 0.0142  | 99 ± 14    | 0.0008  | 3.98 ± 0.76 | 0.107   |

## IL12p70

|                              | BALF        |         | Lung        |         | Plasma      |         |
|------------------------------|-------------|---------|-------------|---------|-------------|---------|
|                              | Mean ± SEM  | P-value | Mean ± SEM  | P-value | Mean ± SEM  | P-value |
| Levofloxacin alone           | 2.93 ± 0.98 |         | 2.96 ± 0.70 |         | 3.68 ± 0.82 |         |
| Levofloxacin + EM703 (-24 h) | 1.44 ± 0.37 | 0.3676  | 2.25 ± 0.63 | 0.7524  | 2.23 ± 0.76 | 0.2035  |
| Levofloxacin + EM703 (0 h)   | 1.69 ± 0.53 | 0.7796  | 3.42 ± 0.78 | >0.9999 | 1.78 ± 0.59 | 0.1389  |

## KC

|                              | BALF       |         | Lung        |         | Plasma     |         |
|------------------------------|------------|---------|-------------|---------|------------|---------|
|                              | Mean ± SEM | P-value | Mean ± SEM  | P-value | Mean ± SEM | P-value |
| Levofloxacin alone           | 622 ± 94   |         | 8401 ± 653  |         | 1255 ± 342 |         |
| Levofloxacin + EM703 (-24 h) | 247 ± 28   | 0.0372  | 1541 ± 190  | 0.0065  | 159 ± 6    | 0.0121  |
| Levofloxacin + EM703 (0 h)   | 299 ± 78   | 0.1551  | 3778 ± 1004 | 0.1551  | 192 ± 17   | 0.0997  |

- P-values were calculated using levofloxacin alone as control.
